# Supplementary material for: Improvement of the Thermal Insulation Performance of Silica Aerogel by Proper Heat Treatment: Microporous Structures Changes and Pyrolysis Mechanism
Source: MDPI journal article supplement (doi:10.3390/gels8030141), 2022-02-23
Supplement: s1 [file s1]

Supplementary Materials

# Improvement of the thermal insulation performance of silica aerogel by proper heat treatment: microporous structures changes and pyrolysis mechanism

Zhiyi Lun <sup>1</sup>, Lunlun Gong <sup>1</sup>, Zhongxin Zhang <sup>1</sup>, Yurui Deng <sup>1</sup>, Yong Zhou <sup>1</sup>, Yuelei Pan <sup>1,\*</sup> and Xudong Cheng <sup>1,\*</sup>

State Key Laboratory of Fire Science, University of Science and Technology of China, Hefei, Anhui 230027, PR China

The file includes **Figures. S1–S3** and **Video S1–S4**.

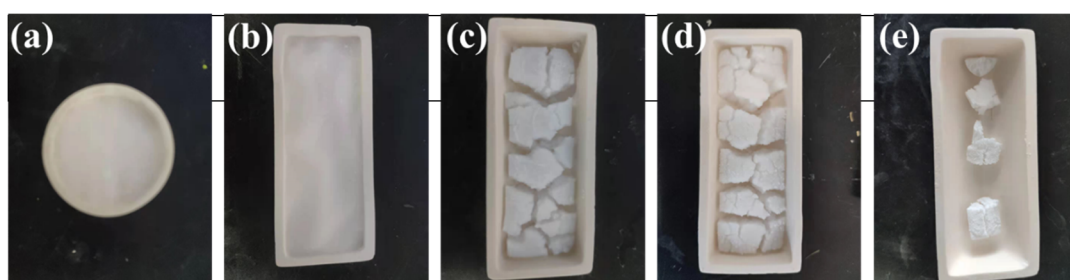

**Figure S1.** photographs of silica aerogel after heat treatment at different temperatures (a) untreated, (b) 200 °C, (c) 400 °C, (d) 600 °C, (e) 800 °C.

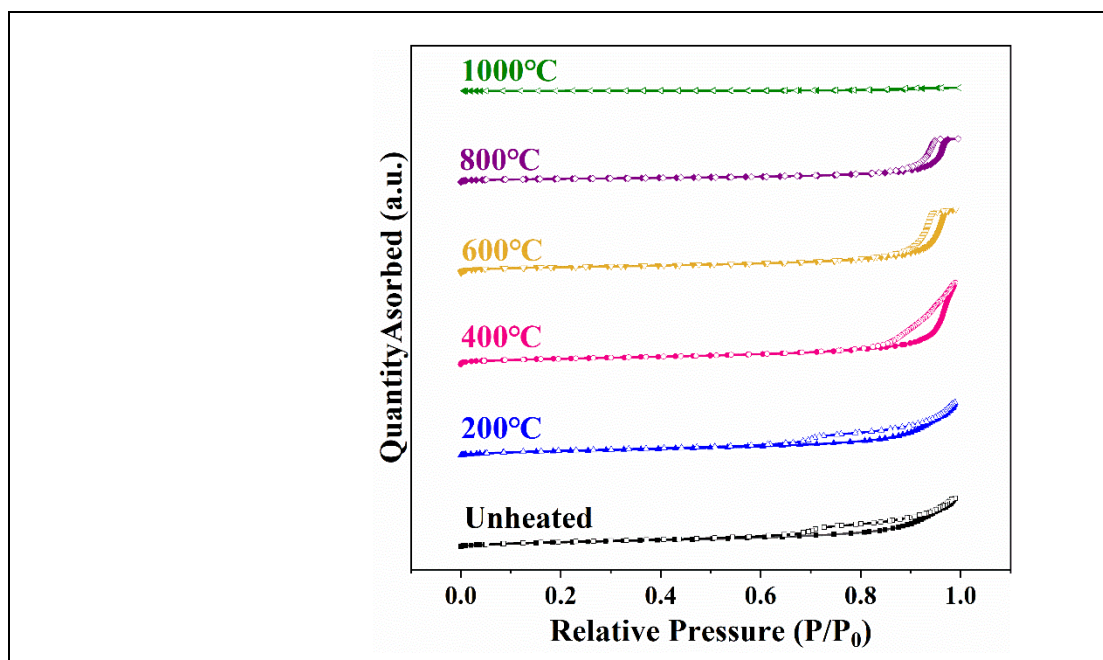

**Figure S2.** N<sub>2</sub> desorption-adsorption isotherms of the silica aerogel samples heated at different temperatures.

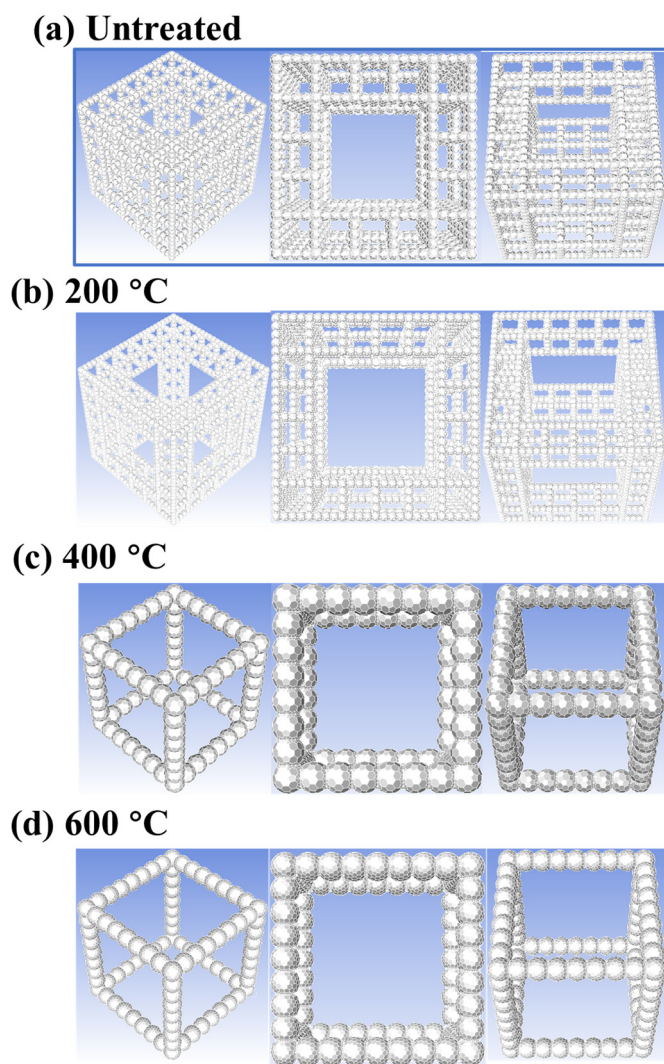

**Figure S3.** Microscopic models of silica aerogel treated at different temperatures **(a)** untreated, **(b)** 200 °C, **(c)** 400 °C and **(d)** 600 °C.

**Supporting Video S1-S4:** Heating process of silica aerogel sample treated at different temperatures (untreated, 200 °C, 400 °C and 600 °C).
