# Supplementary material for: Improvement of the Thermal Insulation Performance of Silica Aerogel by Proper Heat Treatment: Microporous Structures Changes and Pyrolysis Mechanism
Source: Gels. 2022 Feb 23;8(3):141. doi: 10.3390/gels8030141 (PMC8953605; doi:10.3390/gels8030141)
Supplement: Supplementary file 1 [file gels-08-00141-s001.zip]

Archive with 5 entries (5 files):
- supplementary figures.pdf
- Video S1.avi
- Video S2.avi
- Video S3.avi
- Video S4.avi
